# Supplementary material for: Heavy-atom-free π-twisted photosensitizers for fluorescence bioimaging and photodynamic therapy
Source: Royal Society of Chemistry journal article supplement (doi:10.1039/d4tb01014k), 2024-01-01
Supplement: d4tb01014k1.pdf [file d4tb01014k1.pdf]

## Supplementary Information

# Heavy-Atom-Free $\pi$ -Twisted Photosensitizers for Fluorescence Bioimaging and Photodynamic Therapy

*Darío Puchán Sánchez,<sup>†a</sup> Korentin Morice<sup>†a</sup> Monika G. Mutovska,<sup>b</sup> Lhoussain Khrouz,<sup>c</sup> Pierre Josse,<sup>a</sup> Magali Allain,<sup>a</sup> Frédéric Gohier,<sup>a</sup> Philippe Blanchard,<sup>a</sup> Cyrille Monnereau,<sup>c</sup> Tangui Le Bahers,<sup>c,d</sup> Nasim Sabouri,<sup>e</sup> Yulian Zagranyski,<sup>b\*</sup> Clement Cabanetos<sup>a\*</sup> and Marco Deiana<sup>e,f\*</sup>*

<sup>a)</sup> Univ Angers, CNRS, MOLTECH-ANJOU, SFR MATRIX, F-49000 Angers, France

<sup>b)</sup> Faculty of Chemistry and Pharmacy, University of Sofia, 1 James Bourchier blvd., 1164 Sofia, Bulgaria

<sup>c)</sup> ENS de Lyon, CNRS, Laboratoire de Chimie UMR 5182, F-69342 Lyon, France

<sup>d)</sup> Institut Universitaire de France, 5 rue Descartes, 75005 Paris, France

<sup>e)</sup> Department of Medical Biochemistry and Biophysics, Umeå University, SE-901 87, Umeå, Sweden

<sup>f)</sup> Institute of Advanced Materials, Faculty of Chemistry, Wrocław University of Science and Technology, 50-370 Wrocław, Poland

† These authors contributed equally.

Corresponding Authors

\*Clement Cabanetos, E-mail: clement.cabanetos@univ-angers.fr

\*Yulian Zagranyski, E-mail: zagranyskiyulian@gmail.com

\*Marco Deiana, E-mail: m.deiana@pwr.edu.pl

## Table of contents

|                              |           |
|------------------------------|-----------|
| <b>Synthetic procedures</b>  | <b>3</b>  |
| <b>Spectral data</b>         | <b>3</b>  |
| <b>Crystallographic data</b> | <b>17</b> |
| <b>Reference</b>             | <b>17</b> |

## Synthetic procedures

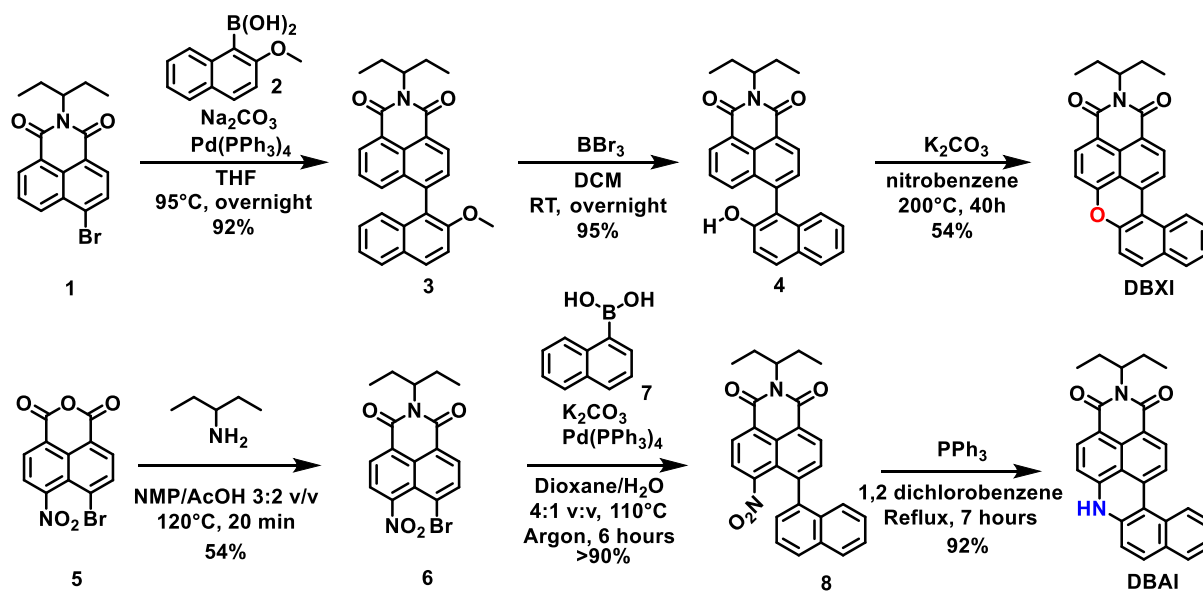

**1** was synthesized according to a reported procedure.<sup>1</sup>

## Spectral data

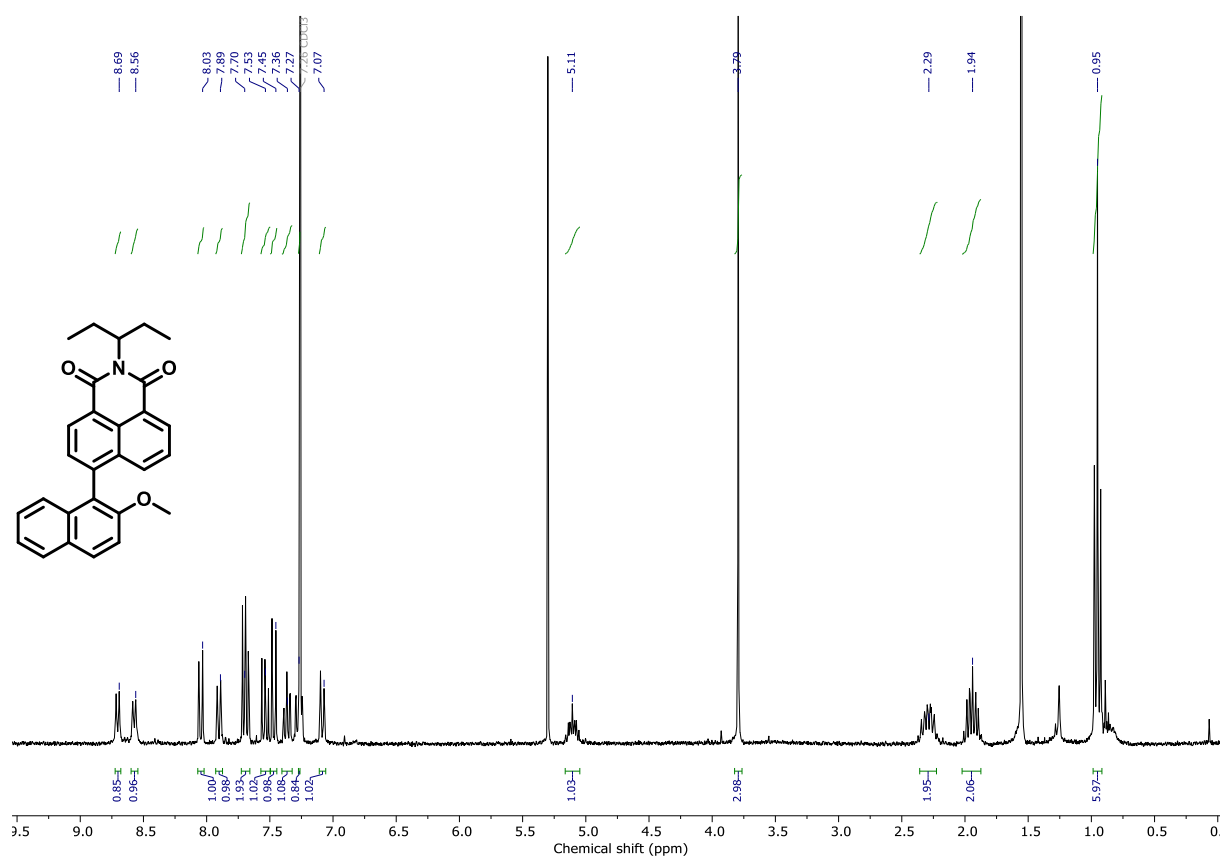

Figure S1. <sup>1</sup>H NMR spectrum (CDCl<sub>3</sub>) of **2**

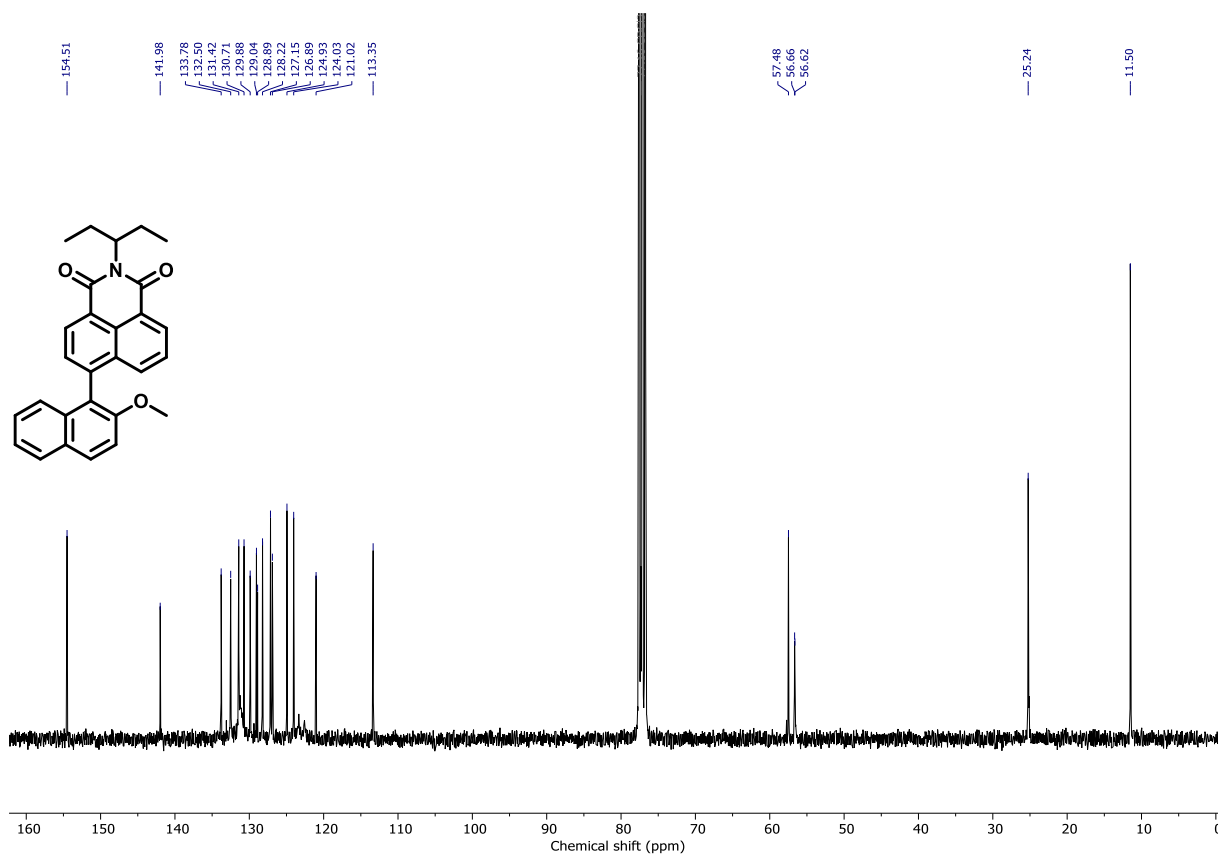

**Figure S2.**  $^{13}\text{C}$  NMR spectrum (CDCl<sub>3</sub>) of 2

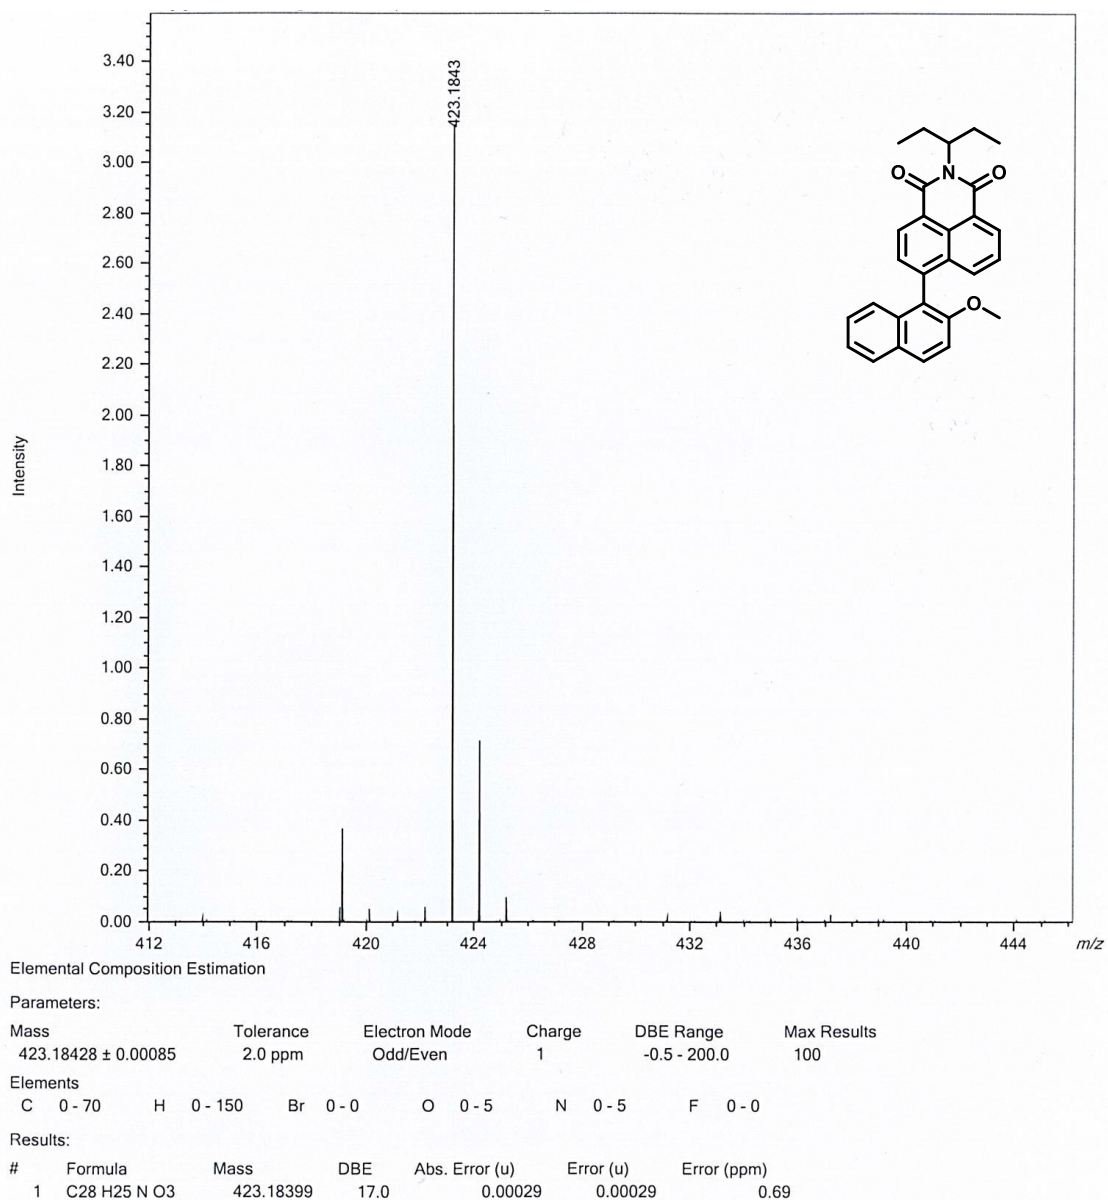

**Figure S3.** HRMS spectrum (MALDI-TOF) of **2**

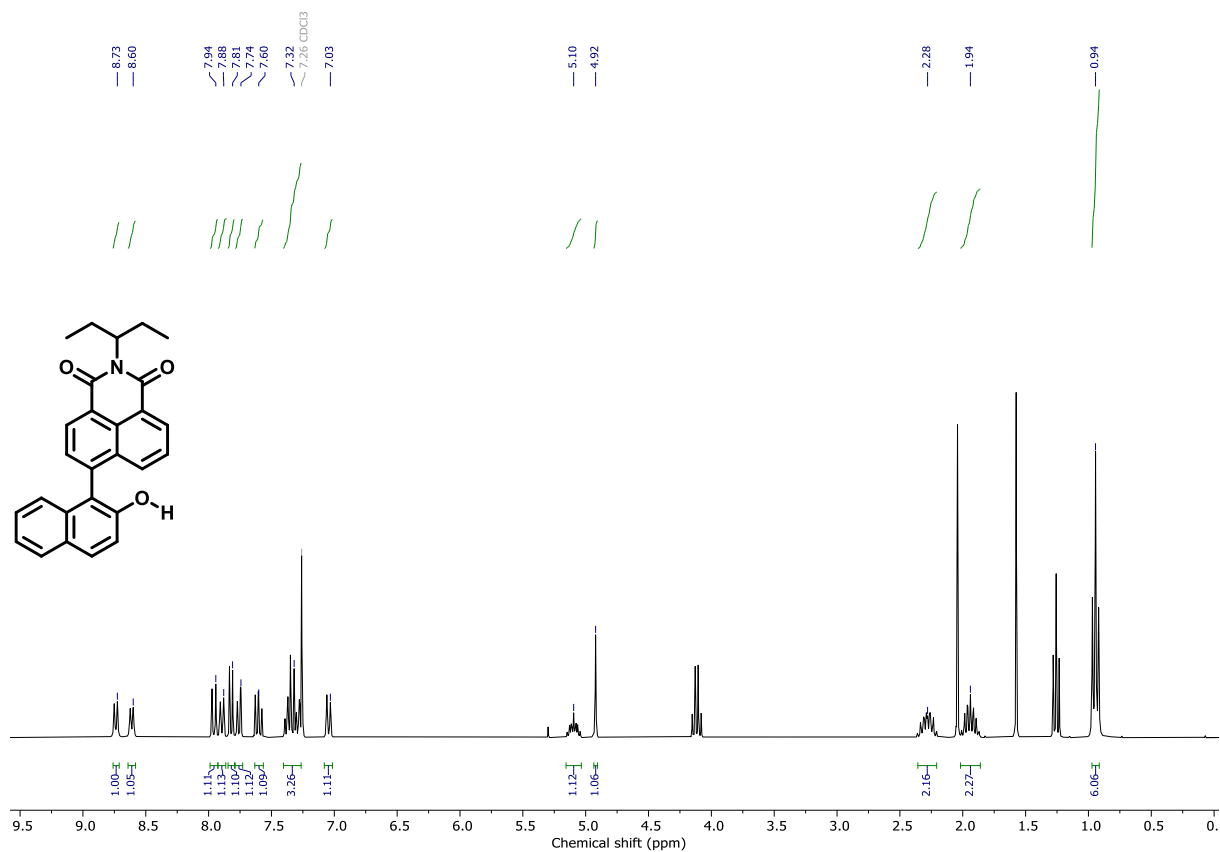

**Figure S4.**  $^1\text{H}$  NMR spectrum ( $\text{CDCl}_3$ ) of **3**

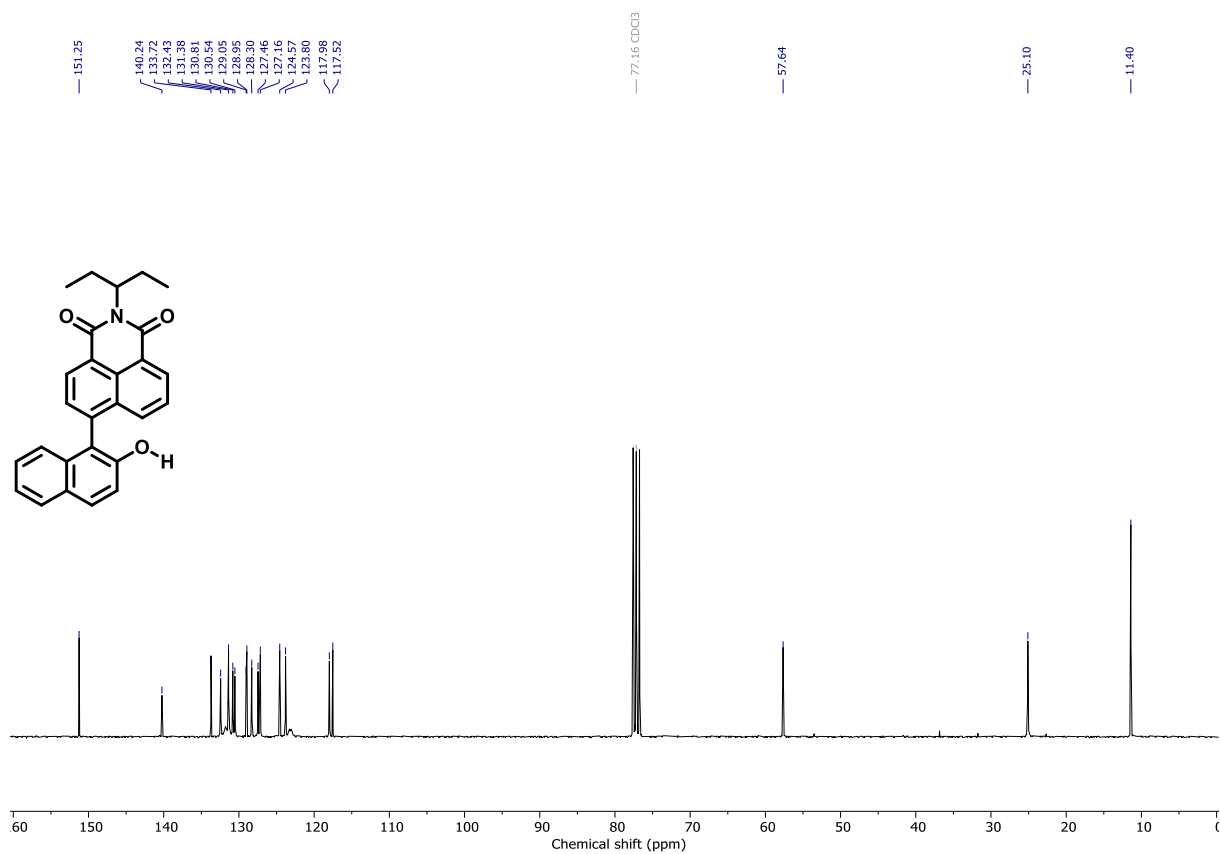

**Figure S5.**  $^{13}\text{C}$  NMR spectrum ( $\text{CDCl}_3$ ) of **3**

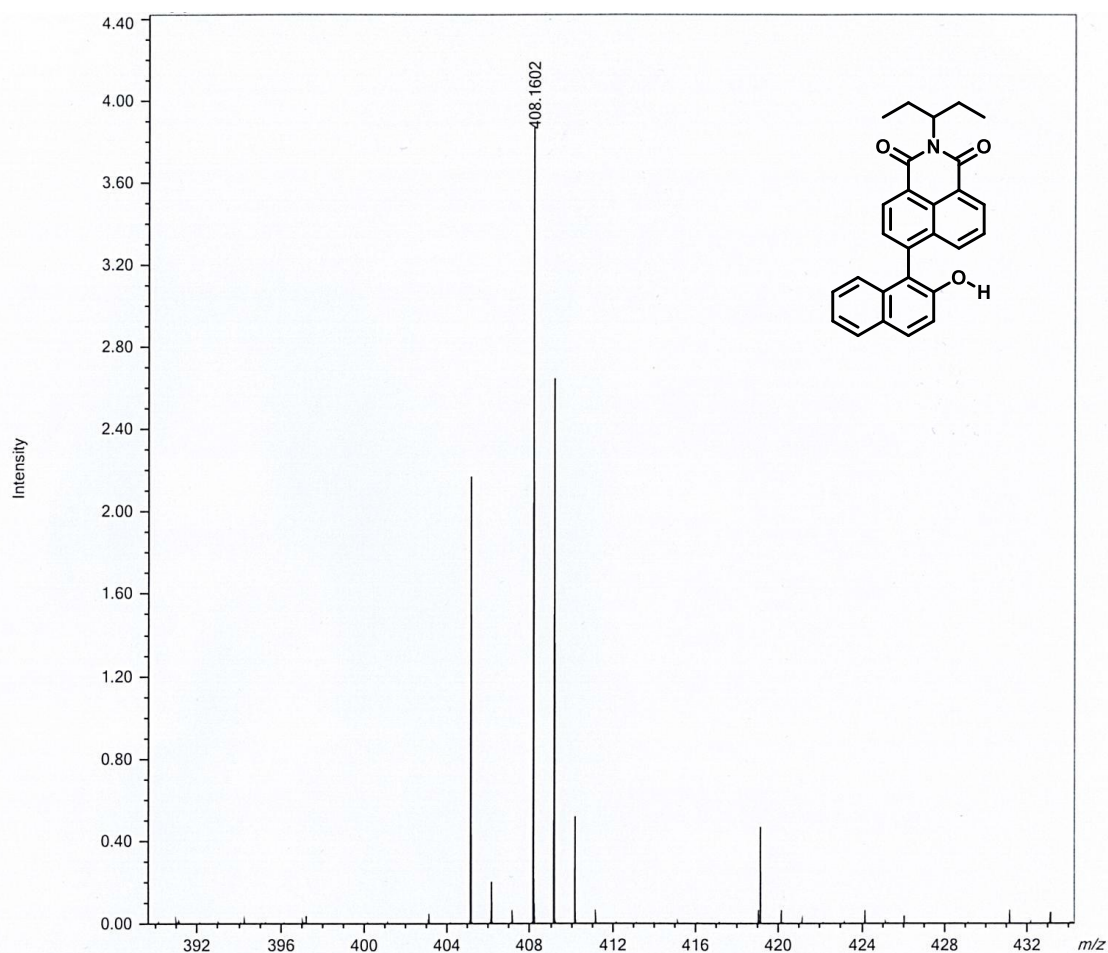

Elemental Composition Estimation

Parameters:

| Mass                | Tolerance | Electron Mode | Charge | DBE Range    | Max Results |
|---------------------|-----------|---------------|--------|--------------|-------------|
| 408.16018 ± 0.00082 | 2.0 ppm   | Odd/Even      | 1      | -0.5 - 200.0 | 100         |

Elements

| C      | H       | Br    | O     | N     | F     |
|--------|---------|-------|-------|-------|-------|
| 0 - 70 | 0 - 150 | 0 - 0 | 0 - 5 | 0 - 5 | 0 - 0 |

Results:

| # | Formula                                                       | Mass      | DBE  | Abs. Error (u) | Error (u) | Error (ppm) |
|---|---------------------------------------------------------------|-----------|------|----------------|-----------|-------------|
| 1 | C <sub>27</sub> H <sub>22</sub> N <sub>1</sub> O <sub>3</sub> | 408.16052 | 17.5 | 0.00033        | -0.00033  | -0.82       |

**Figure S6.** HRMS spectrum (MALDI-TOF) of **3**

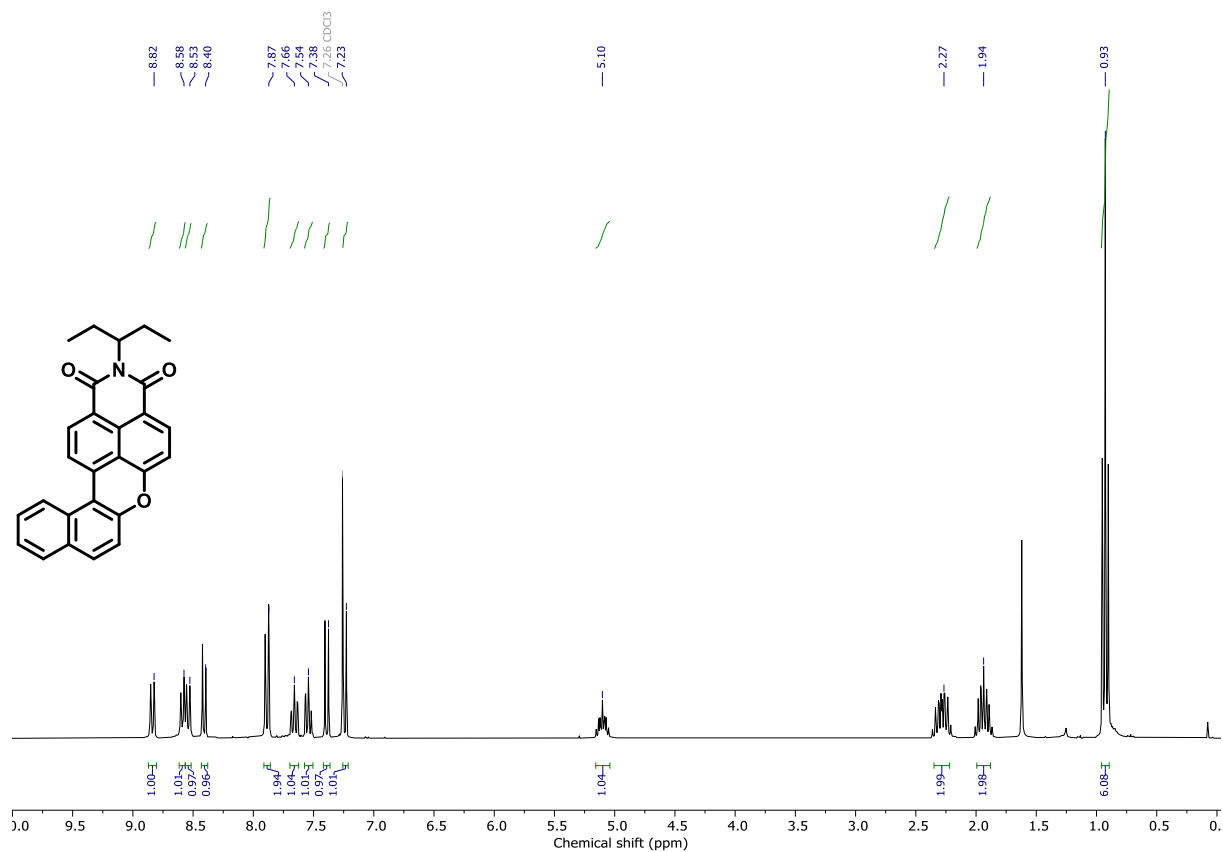

**Figure S7.** <sup>1</sup>H NMR spectrum (CDCl<sub>3</sub>) of DBXI

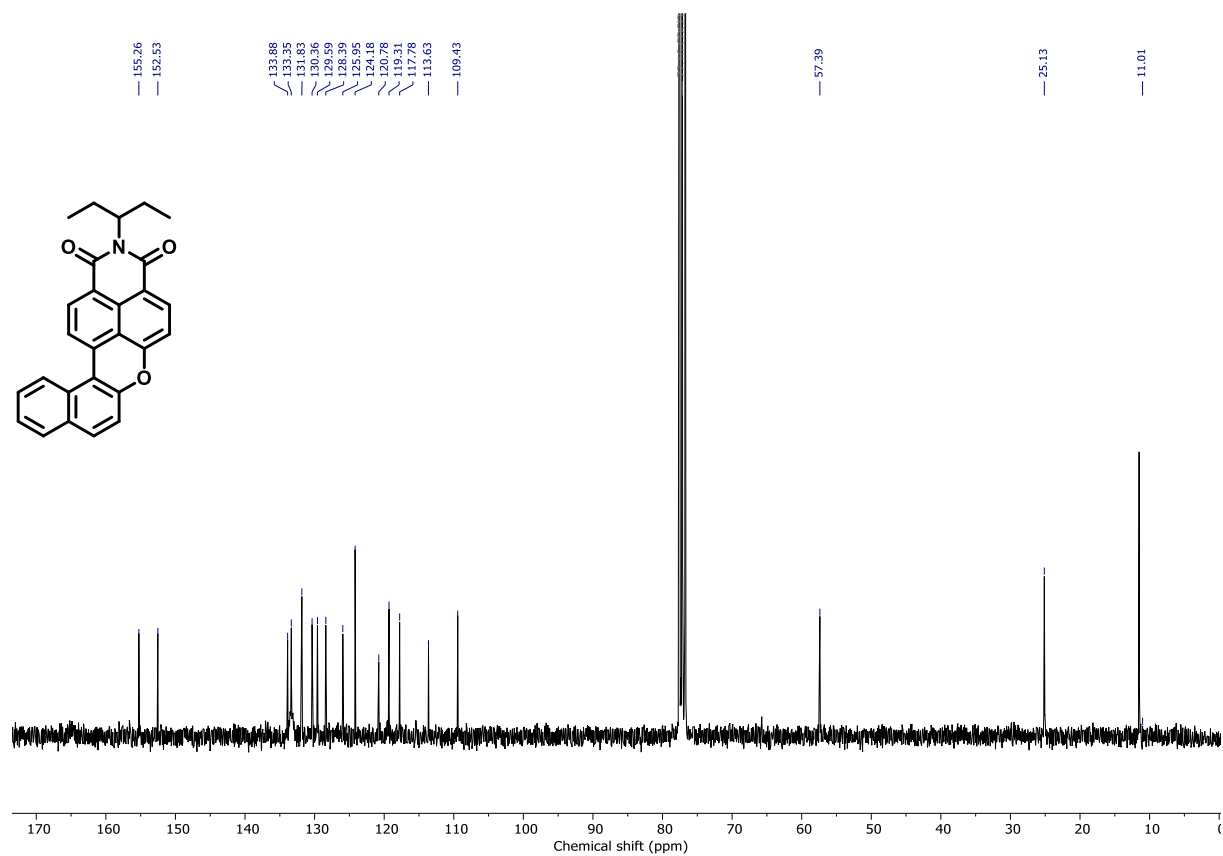

**Figure S8.** <sup>13</sup>C NMR spectrum (CDCl<sub>3</sub>) of DBXI



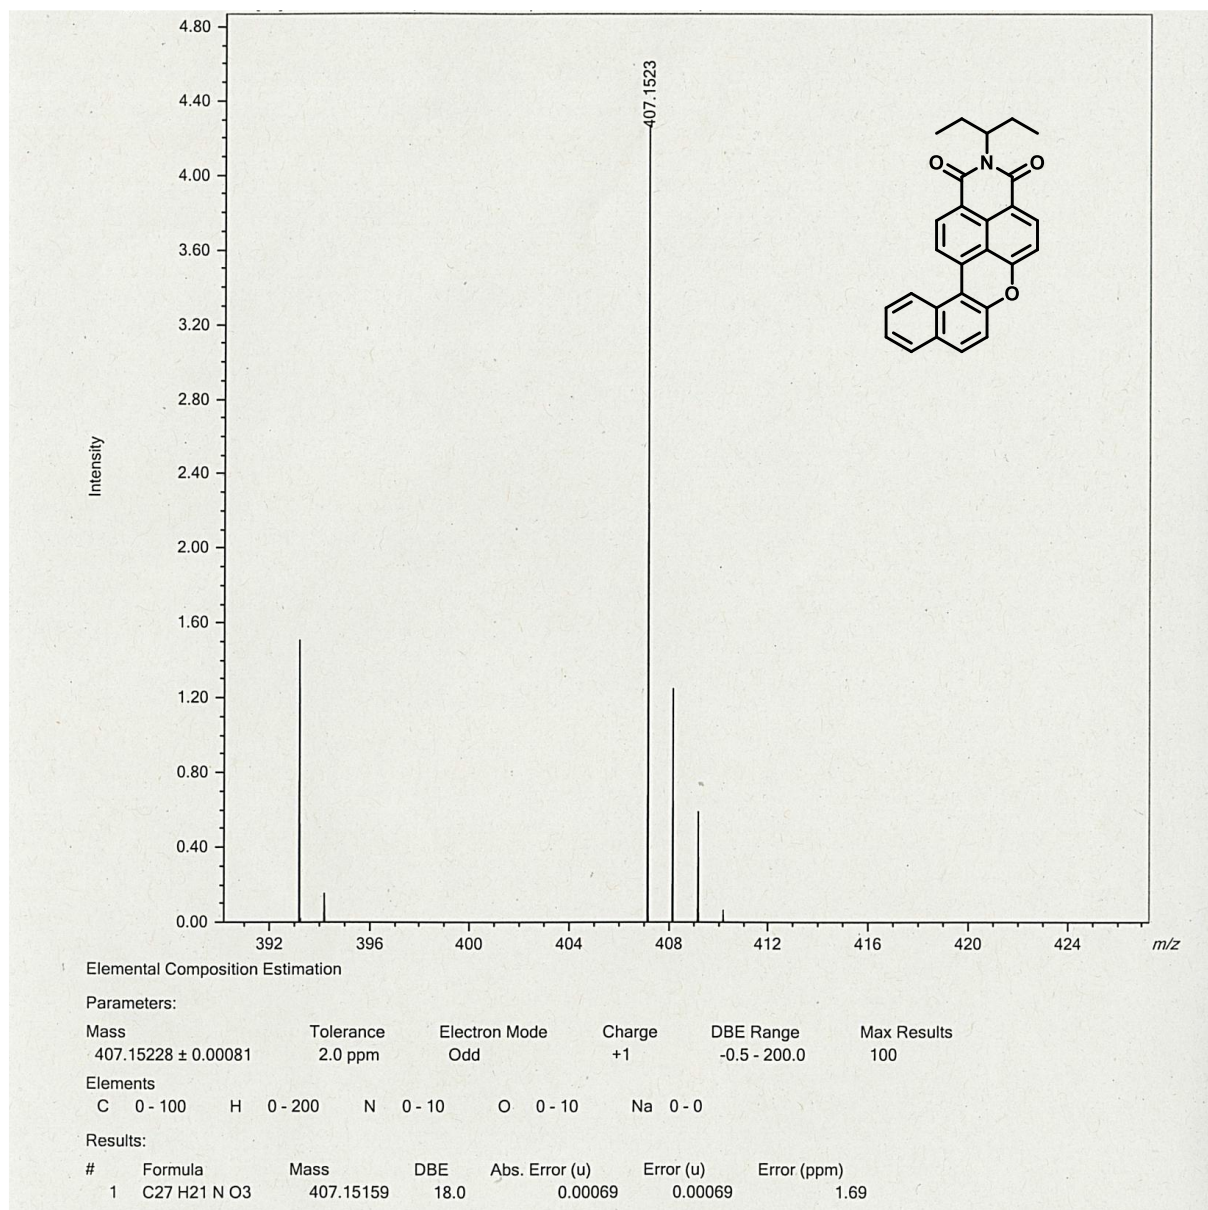

**Figure S9.** HRMS spectrum (MALDI-TOF) of DBXI

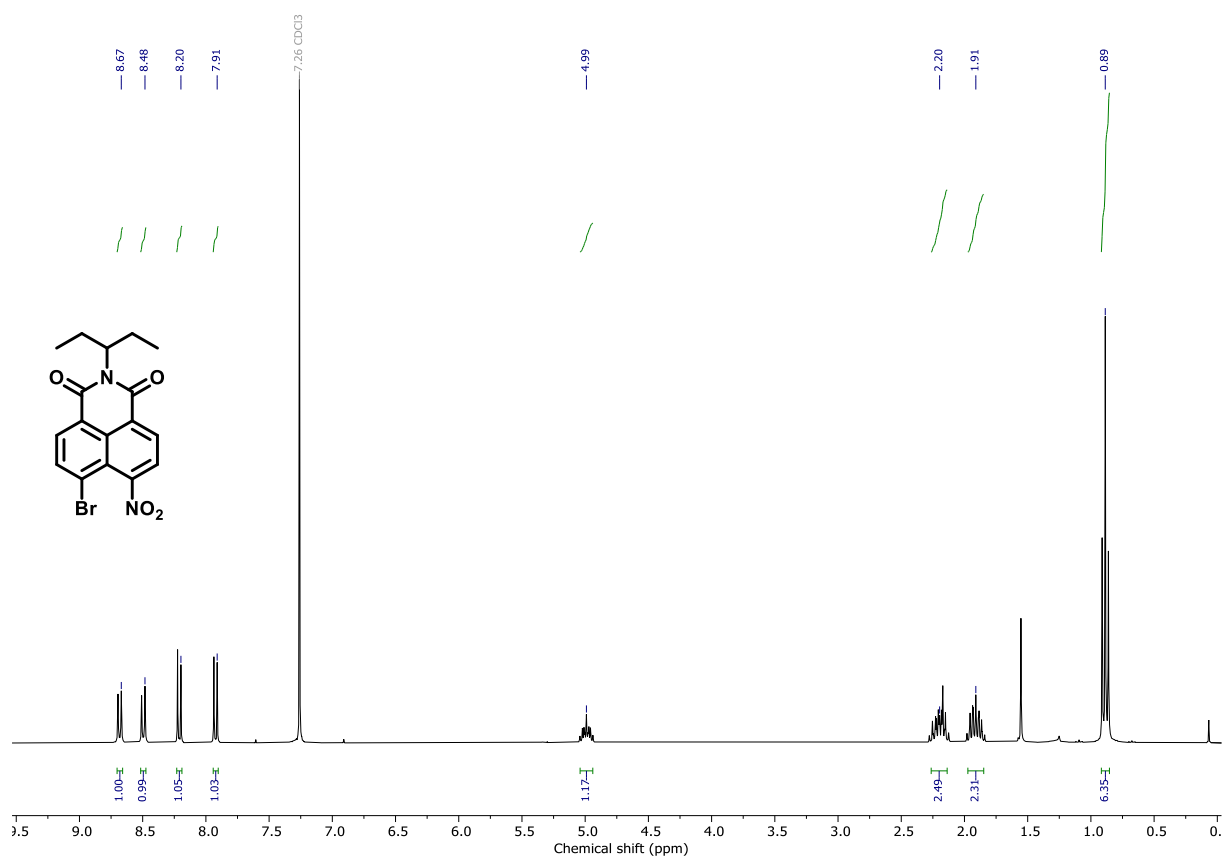

**Figure S10.**  $^1\text{H}$  NMR spectrum ( $\text{CDCl}_3$ ) of **5**

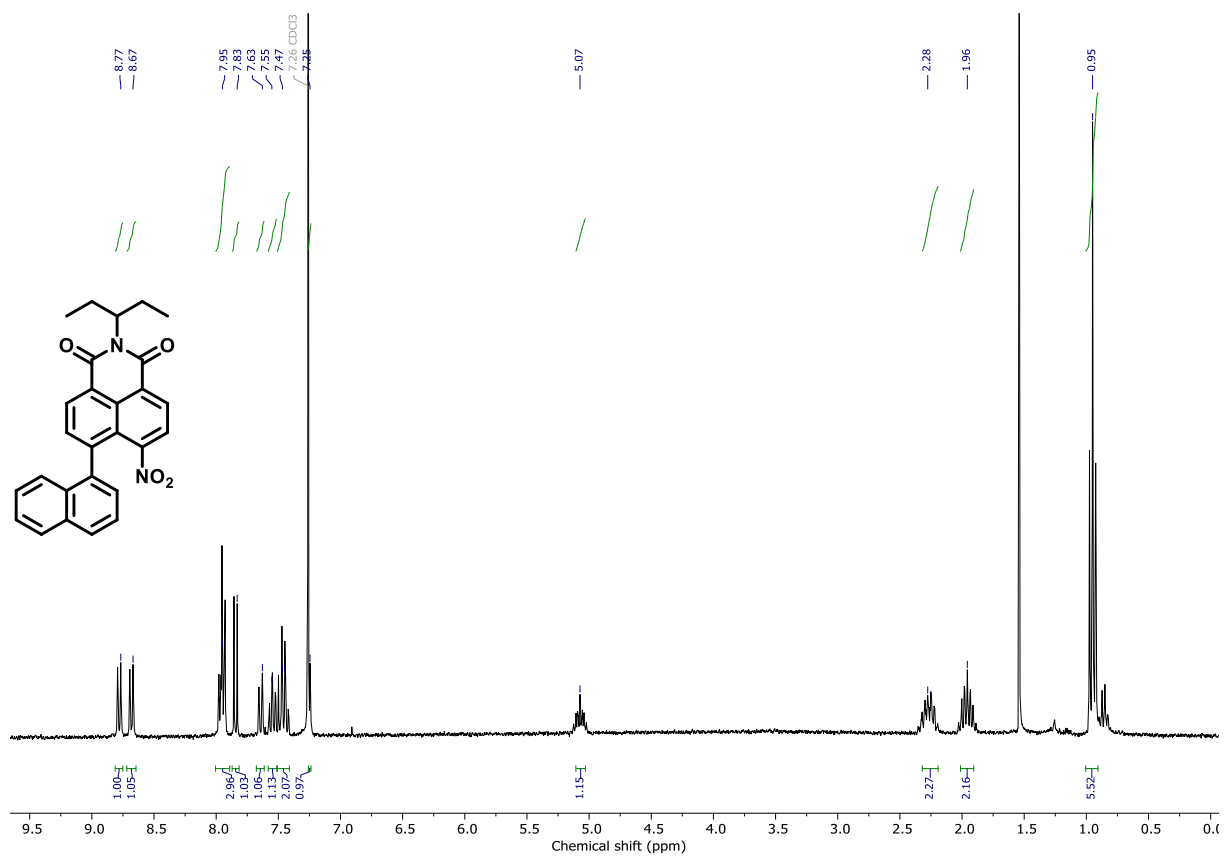

**Figure S11.**  $^1\text{H}$  NMR spectrum ( $\text{CDCl}_3$ ) of **6**

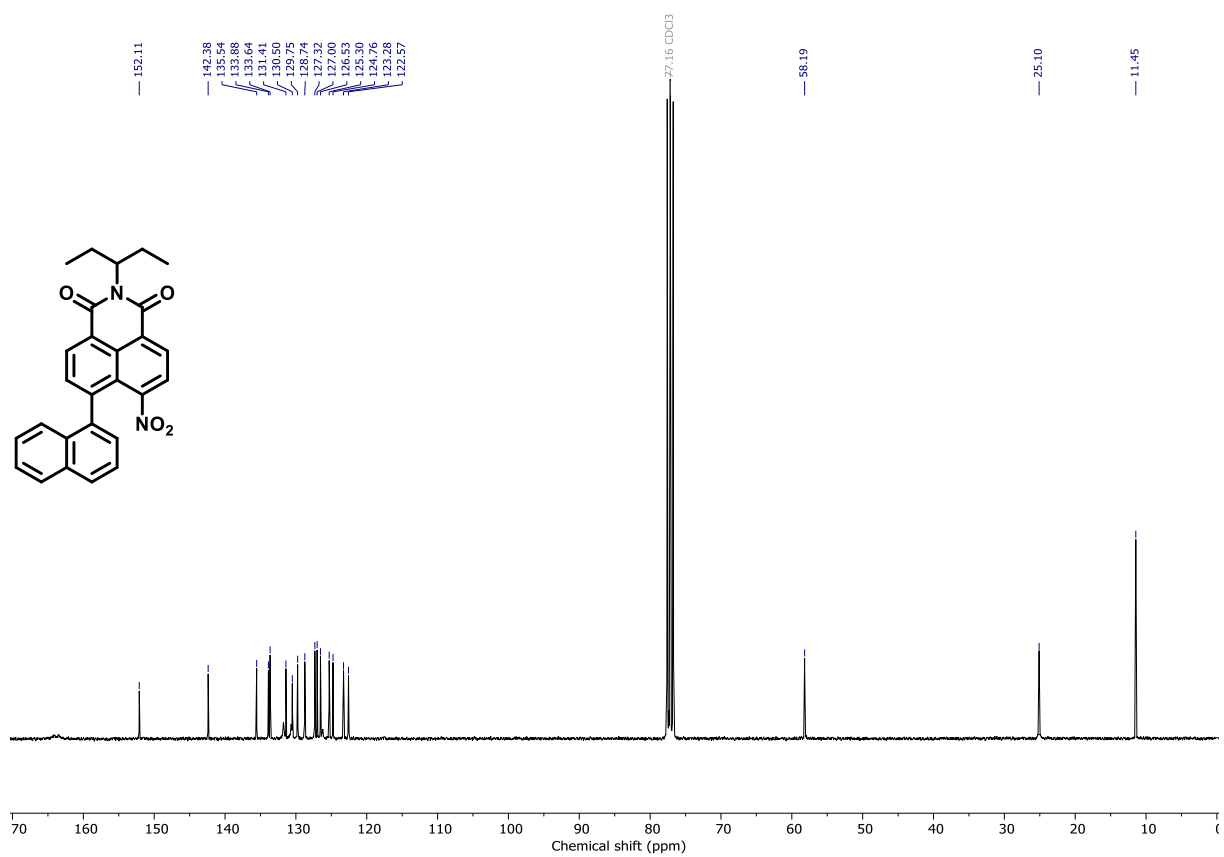

**Figure S12.**  $^{13}\text{C}$  NMR spectrum (CDCl<sub>3</sub>) of **6**

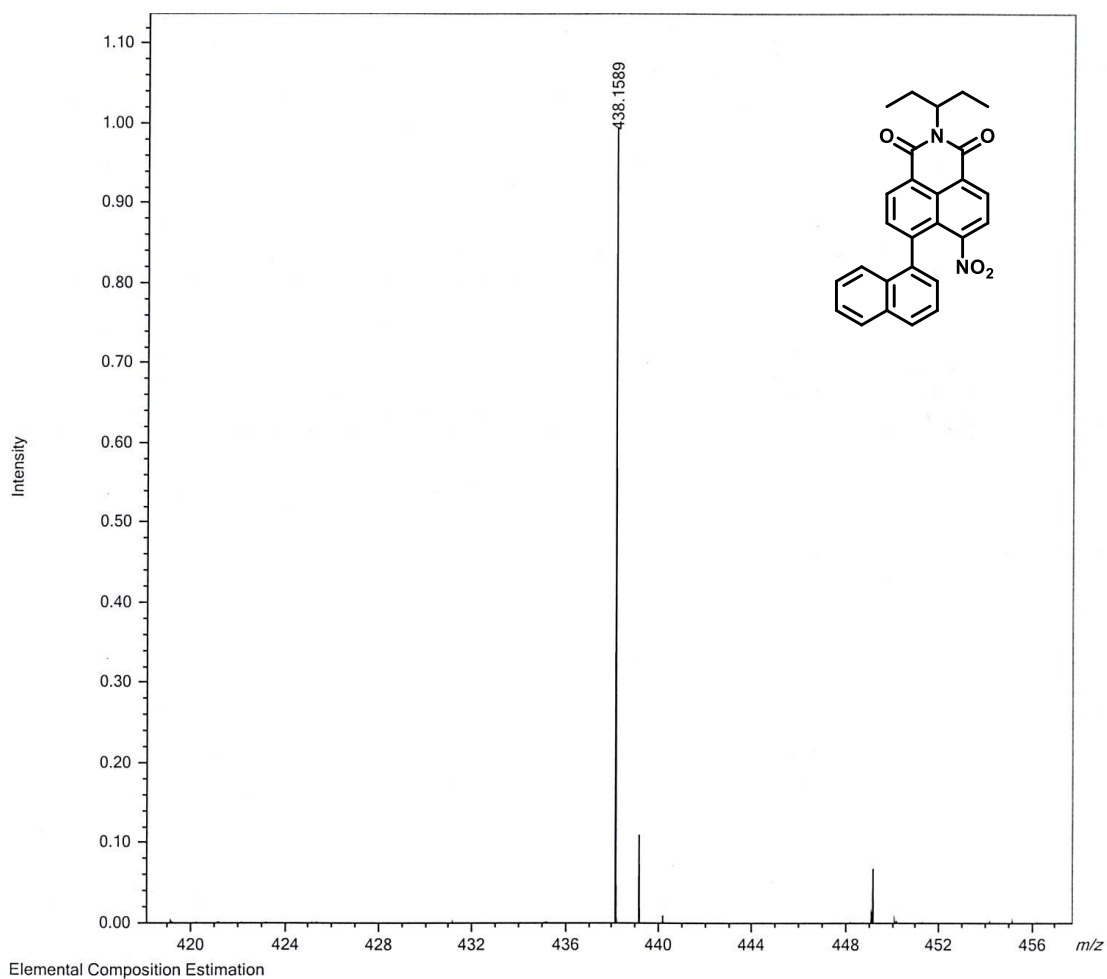

Parameters:

| Mass                | Tolerance | Electron Mode | Charge | DBE Range    | Max Results |
|---------------------|-----------|---------------|--------|--------------|-------------|
| 438.15889 ± 0.00131 | 3.0 ppm   | Odd           | 1      | -0.5 - 200.0 | 100         |

Elements

| C      | H      | S     | O     | Na    | N     | Br    |
|--------|--------|-------|-------|-------|-------|-------|
| 0 - 30 | 0 - 30 | 0 - 0 | 0 - 5 | 0 - 0 | 0 - 5 | 0 - 0 |

Results:

| # | Formula                                                       | Mass      | DBE  | Abs. Error (u) | Error (u) | Error (ppm) |
|---|---------------------------------------------------------------|-----------|------|----------------|-----------|-------------|
| 1 | C <sub>27</sub> H <sub>22</sub> N <sub>2</sub> O <sub>4</sub> | 438.15851 | 18.0 | 0.00038        | 0.00038   | 0.88        |

**Figure S13.** HRMS spectrum (MALDI-TOF) of **6**

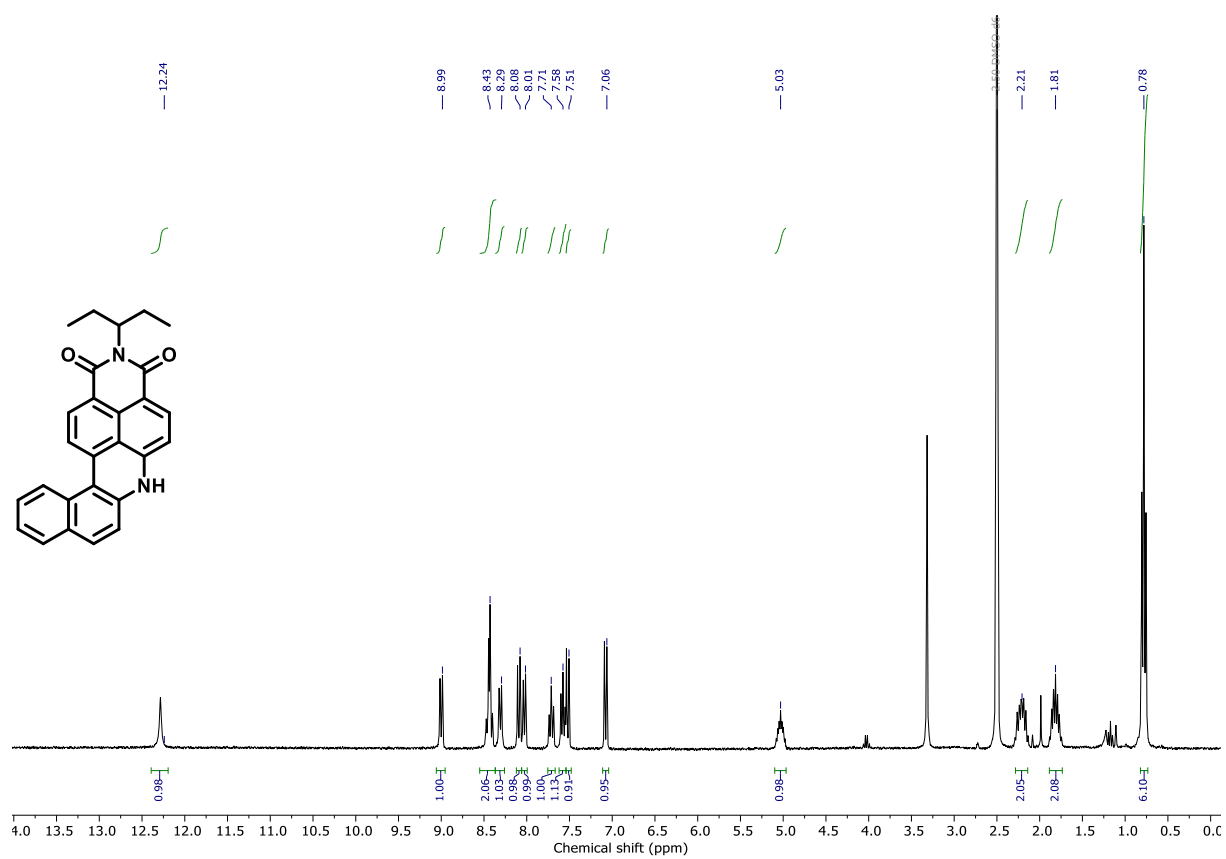

**Figure S14.** <sup>1</sup>H NMR spectrum (CDCl<sub>3</sub>) of DBAI

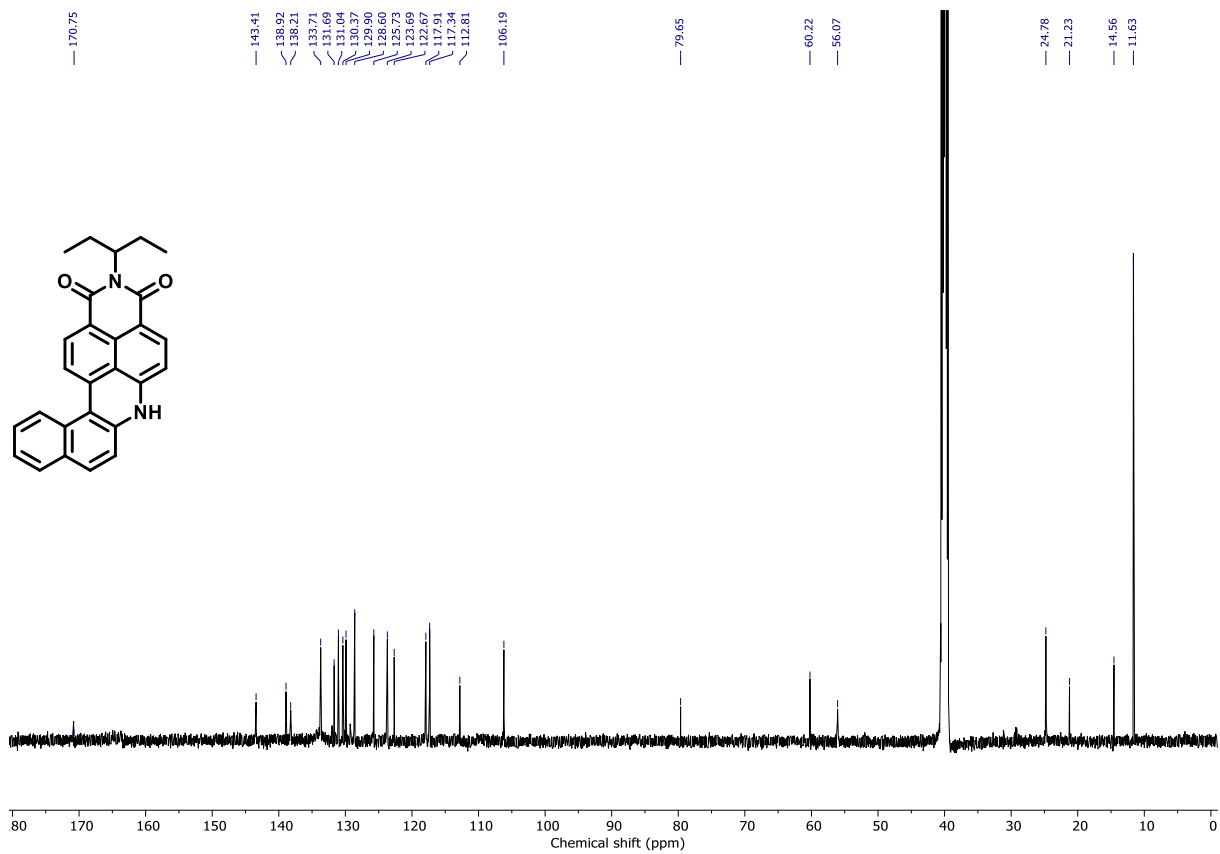

**Figure S15.**  $^{13}\text{C}$  NMR spectrum ( $\text{CDCl}_3$ ) of *DBAI*

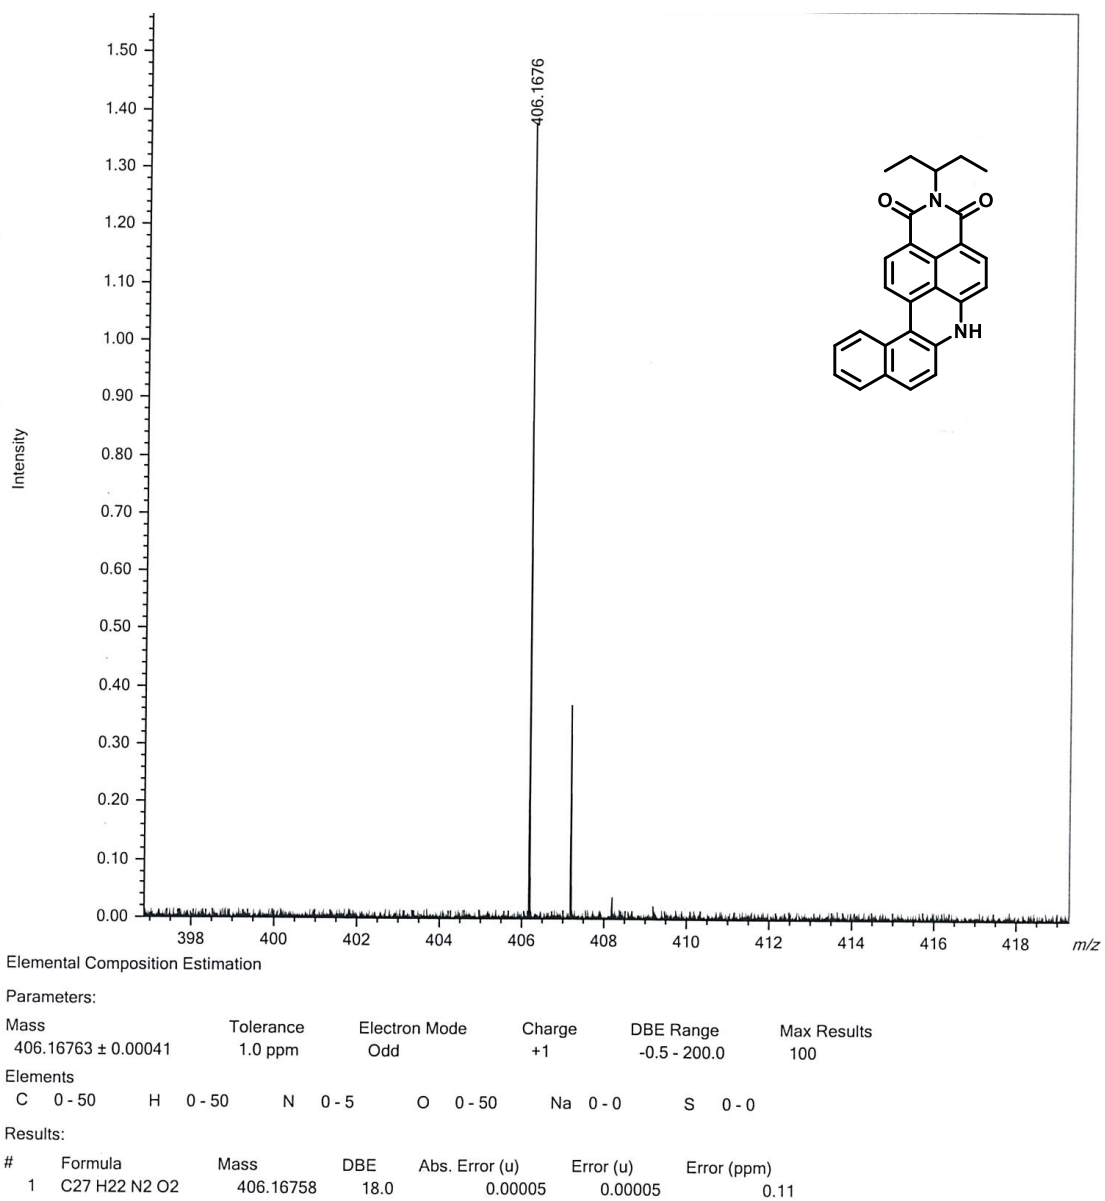

**Figure S16.** HRMS spectrum (MALDI-TOF) of DBAI



## Crystallographic data

**Table S1.** X-Ray single crystal diffraction data for DBI, DBXI, DBAI.

| Crystal                                                | DBI                                                   | DBXI                                            | DBAI                                                          |
|--------------------------------------------------------|-------------------------------------------------------|-------------------------------------------------|---------------------------------------------------------------|
| Formula                                                | C <sub>27</sub> H <sub>21</sub> NO <sub>2</sub> S     | C <sub>27</sub> H <sub>21</sub> NO <sub>3</sub> | C <sub>27</sub> H <sub>24</sub> N <sub>2</sub> O <sub>3</sub> |
| Molecular Weight                                       | 423.51                                                | 407.45                                          | 424.48                                                        |
| Temperature (K)                                        | 150                                                   | 200                                             | 200                                                           |
| Crystal system                                         | Orthorhombic                                          | Triclinic                                       | Triclinic                                                     |
| Space group                                            | <i>P</i> 2 <sub>1</sub> 2 <sub>1</sub> 2 <sub>1</sub> | <i>P</i> -1                                     | <i>P</i> -1                                                   |
| a (Å)                                                  | 7.4412(2)                                             | 7.394(1)                                        | 8.116(1)                                                      |
| b (Å)                                                  | 8.0589(3)                                             | 11.029(1)                                       | 11.003(1)                                                     |
| c (Å)                                                  | 33.526(1)                                             | 12.950(2)                                       | 11.670(1)                                                     |
| α (°)                                                  | 90                                                    | 103.47(1)                                       | 87.387(9)                                                     |
| β (°)                                                  | 90                                                    | 92.67(1)                                        | 84.33(1)                                                      |
| γ (°)                                                  | 90                                                    | 108.59(1)                                       | 87.188(9)                                                     |
| V (Å <sup>3</sup> )                                    | 2010.5(1)                                             | 965.1(3)                                        | 1034.8(2)                                                     |
| Z                                                      | 4                                                     | 2                                               | 2                                                             |
| Crystal color                                          | Orange                                                | Yellow                                          | Orange                                                        |
| Crystal size (mm <sup>3</sup> )                        | 0.161x0.135x0.032                                     | 0.294x0.129x0.019                               | 0.123x0.066x0.033                                             |
| D <sub>c</sub> (g cm <sup>-3</sup> )                   | 1.399                                                 | 1.402                                           | 1.362                                                         |
| μ (mm <sup>-1</sup> )                                  | 1.630                                                 | 0.731                                           | 0.715                                                         |
| F(000)                                                 | 888                                                   | 428                                             | 448                                                           |
| Transmission (min/max)                                 | 0.904/1.000                                           | 0.798/1.000                                     | 0.692/1.000                                                   |
| θ (min/max) (°)                                        | 2.636 / 72.412                                        | 3.54 / 74.589                                   | 3.81 / 72.338                                                 |
| Data collected                                         | 7476                                                  | 6318                                            | 7015                                                          |
| Data unique                                            | 3803                                                  | 3626                                            | 3889                                                          |
| Data observed                                          | 3613                                                  | 1848                                            | 2367                                                          |
| R (int)                                                | 0.0276                                                | 0.0809                                          | 0.0639                                                        |
| Nb of parameters                                       | 294                                                   | 295                                             | 313                                                           |
| R <sub>1</sub> [I > 2σ(I)]                             | 0.0546                                                | 0.0684                                          | 0.0921                                                        |
| wR <sub>2</sub> [I > 2σ(I)]                            | 0.1353                                                | 0.1518                                          | 0.02343                                                       |
| R <sub>1</sub> [all data]                              | 0.0574                                                | 0.1251                                          | 0.1251                                                        |
| wR <sub>2</sub> [all data]                             | 0.1370                                                | 0.1964                                          | 0.2753                                                        |
| GOF on F <sup>2</sup>                                  | 1.130                                                 | 0.976                                           | 1.038                                                         |
| Largest peak in final: difference (e Å <sup>-3</sup> ) | 0.486/-0.400                                          | 0.259/-0.233                                    | 0.388/-0.331                                                  |

## References

(1) Josse, P.; Morice, K.; Puchán Sánchez, D.; Ghanem, T.; Boixel, J.; Blanchard, P.; Cabanetos, C. Revisiting the synthesis of the benzothioxanthene imide five decades later. *New Journal of Chemistry* **2022**, *46* (18), 8393-8397. DOI: 10.1039/D2NJ00955B.
